# Supplementary material for: Two-dimensional SnO2 anchored biomass-derived carbon nanosheet anode for high-performance Li-ion capacitors
Source: Royal Society of Chemistry journal article supplement (doi:10.1039/d1ra00822f), 2021-01-01
Supplement: d1ra00822f1.pdf [file d1ra00822f1.pdf]

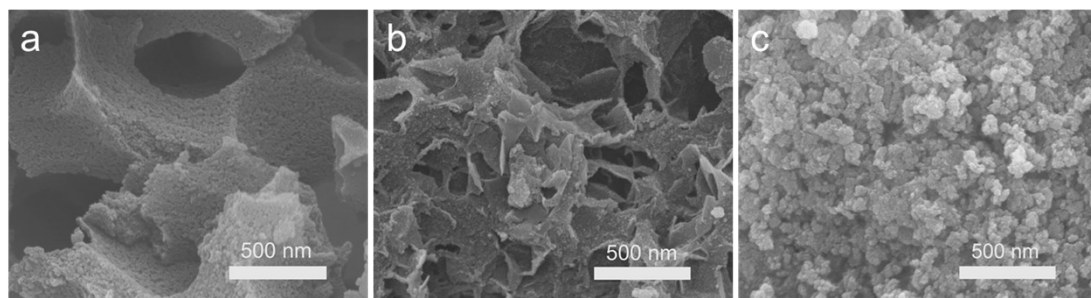

**Fig. S1** SEM images of the samples: (a) PCN, (b) SnO<sub>2</sub>/PCN, (c) pure SnO<sub>2</sub>.

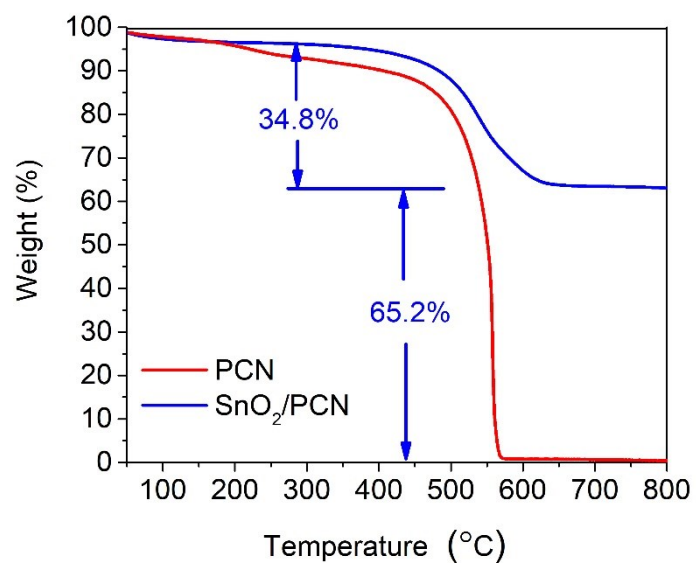

**Fig. S2** TG analysis of SnO<sub>2</sub>/PCN in air flow.

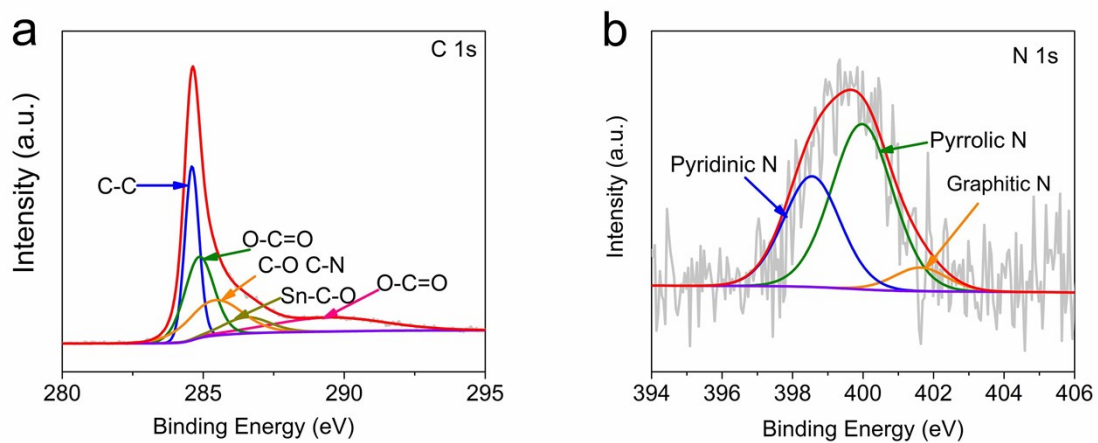

**Fig. S3** (a) C 1s and (b) N 1s XPS spectra of SnO<sub>2</sub>/PCN.

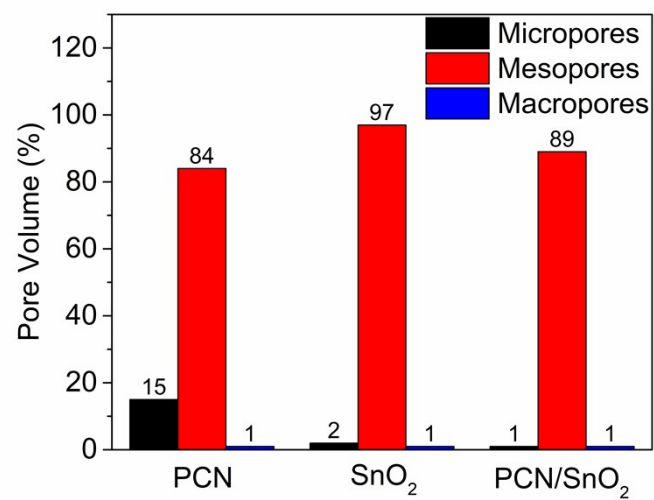

**Fig. S4** The proportion of micropores, mesopores and macropores for all samples.

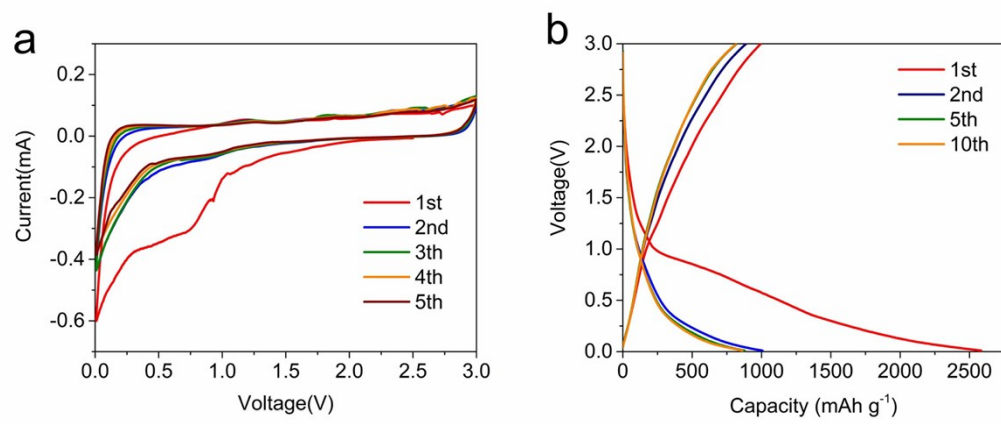

**Fig. S5** (a) CV curves of PCN at a scan rate of  $0.1 \text{ mV s}^{-1}$ ; (b) Galvanostatic charge/discharge curves of PCN at  $0.1 \text{ A g}^{-1}$ .

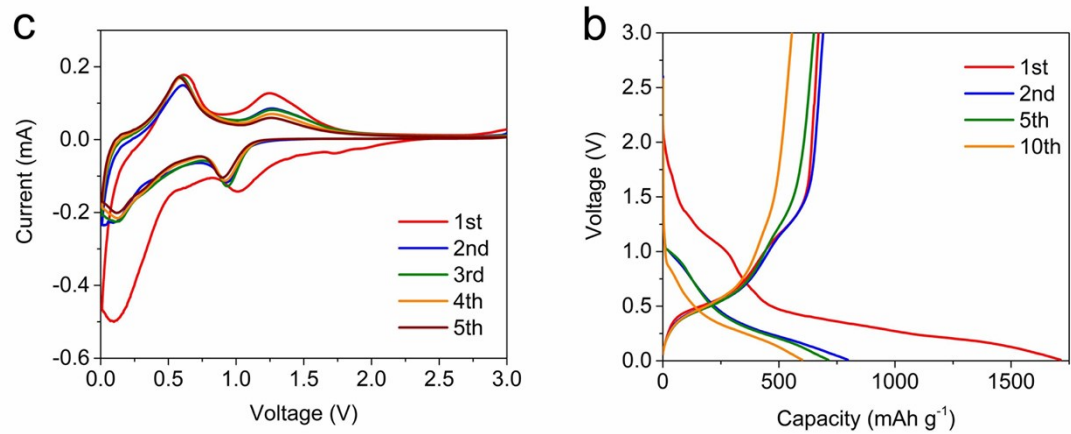

**Fig. S6** (a) CV curves of SnO<sub>2</sub> at a scan rate of 0.1 mV s<sup>-1</sup>; (b) Galvanostatic charge/discharge curves of SnO<sub>2</sub> at 0.1 A g<sup>-1</sup>.

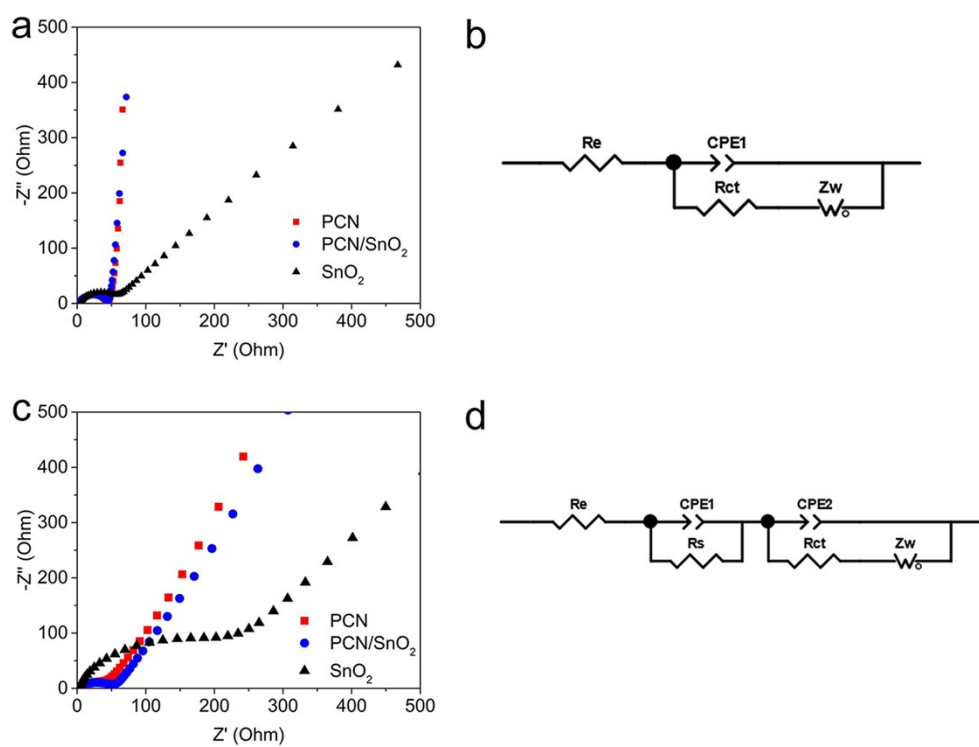

**Fig. S7** Nyquist plots of PCN, SnO<sub>2</sub> and SnO<sub>2</sub>/PCN electrodes (a) before cycling, (c) after 500 cycles. The equivalent circuits: (b) before cycling, (d) after 500 cycles.

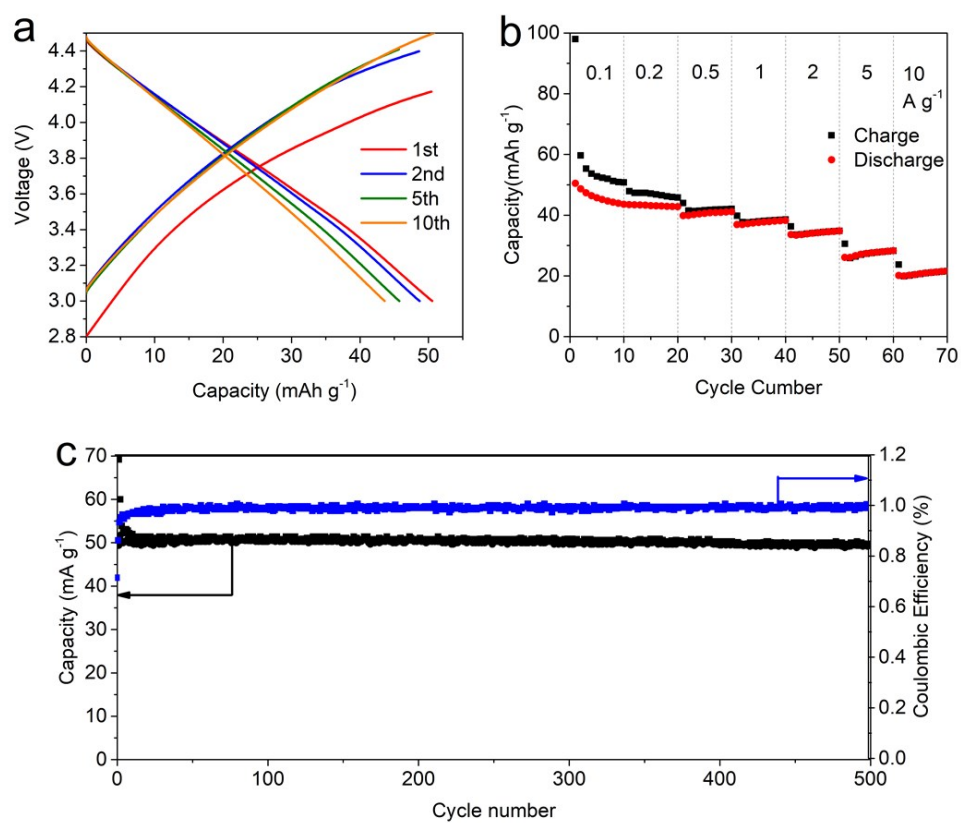

**Fig. S8** (a) Galvanostatic charge/discharge curves of PCN at 0.1 A g<sup>-1</sup>; (b) Rate capabilities of PCN at various current densities; (c) Cycling performance of the PCN cathode at 1 A g<sup>-1</sup>.



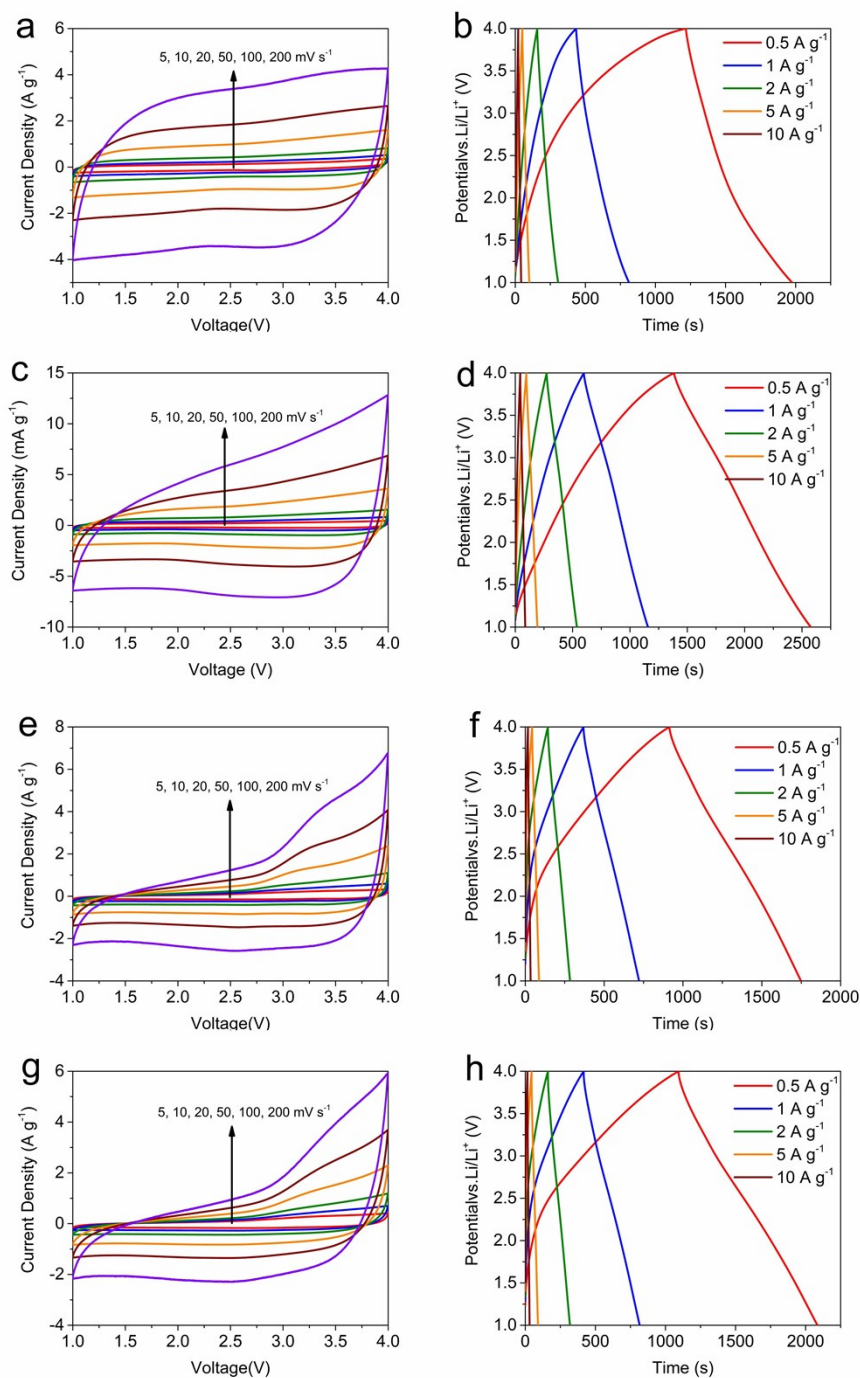

**Fig. S9** Electrochemical properties of the SnO<sub>2</sub>/PCN//PCN with different mass ratio of anode to cathode: CV curves at various scan rates ranging from 5 to 200 mV s<sup>-1</sup> with mass ratio of (a) 1:1, (c) 1:2, (e) 1:3 and (g) 1:4; GCD profiles at different current densities of 0.5 to 10 A g<sup>-1</sup> with mass ratio of (b) 1:1, (d) 1:2, (f) 1:3 and (h) 1:4.

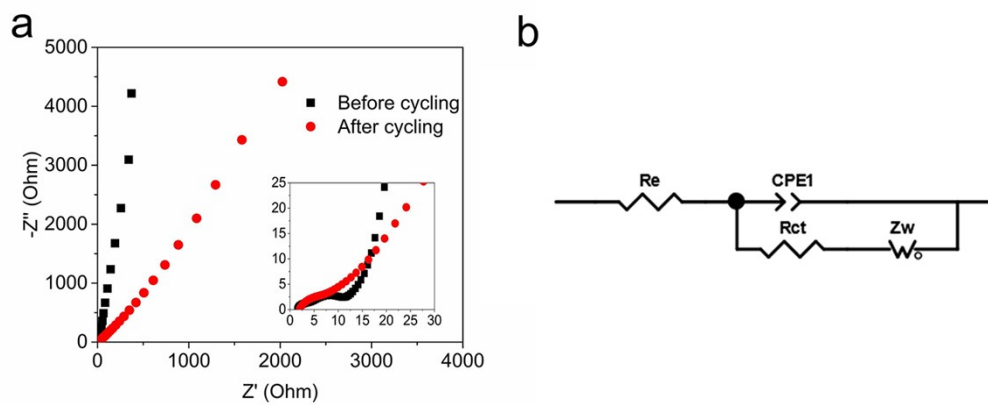

**Fig. S10** (a) Electrochemical impedances (EIS) of SnO<sub>2</sub>/PCN //PCN before cycling and after 5000 cycles; (b) the equivalent circuits.

**Table S1.** Comparison with the performance of previously reported Li-ion capacitors.

| Hybrid system                                                 | Voltage Window | Energy Density/<br>Power Density                                                                            | Ref.      |
|---------------------------------------------------------------|----------------|-------------------------------------------------------------------------------------------------------------|-----------|
| SnO <sub>2</sub> /PCN//PCN (Li <sup>+</sup> )                 | 1-4 V          | 138 W h kg <sup>-1</sup> /416 W kg <sup>-1</sup><br>51 W h kg <sup>-1</sup> /53 kW kg <sup>-1</sup>         | This work |
| Zr-MOF//AC (Li <sup>+</sup> )                                 | 1-4 V          | 122.5 W h kg <sup>-1</sup> / 250 W kg <sup>-1</sup><br>34.4 W h kg <sup>-1</sup> /12.5 kW kg <sup>-1</sup>  | [72]      |
| MnO@HCF//AC (Li <sup>+</sup> )                                | 0.5-3.8 V      | 87.4 W h kg <sup>-1</sup> /215 W kg <sup>-1</sup><br>50.6 W h kg <sup>-1</sup> /10.75 W kg <sup>-1</sup>    | [73]      |
| h-V <sub>2</sub> O <sub>3</sub> @C//AC (Li <sup>+</sup> )     | 1-4 V          | ≈118 W h kg <sup>-1</sup> /250 W kg <sup>-1</sup><br>78 W h kg <sup>-1</sup> / 20 kW kg <sup>-1</sup>       | [74]      |
| CNF//PANi@CNF (Li <sup>+</sup> )                              | 2-4 V          | 106.5 W h kg <sup>-1</sup> /769 W kg <sup>-1</sup><br>64.5 W h kg <sup>-1</sup> /15087.1 W kg <sup>-1</sup> | [75]      |
| Ni <sub>2</sub> P@N-C//AC (Li <sup>+</sup> )                  | 1-4 V          | 126 W h kg <sup>-1</sup> /500 W kg <sup>-1</sup><br>80 W h kg <sup>-1</sup> /12.5 kW kg <sup>-1</sup>       | [76]      |
| 3DC@LTSO//LDAC (Li <sup>+</sup> )                             | 0.5-4 V        | 115.3 W h kg <sup>-1</sup> /163.5 W kg <sup>-1</sup><br>60 W h kg <sup>-1</sup> /65.6 kW kg <sup>-1</sup>   | [77]      |
| Fe <sub>3</sub> O <sub>4</sub> @C//AC (Li <sup>+</sup> )      | 0-4 V          | 110.1 W h kg <sup>-1</sup> / 250W kg <sup>-1</sup><br>36.8 W h kg <sup>-1</sup> /2.5 kW kg <sup>-1</sup>    | [78]      |
| T-Nb <sub>2</sub> O <sub>5</sub> @NC//NCC (Li <sup>+</sup> )  | 1-3.5 V        | 93.8 W h kg <sup>-1</sup> /112.5 W kg <sup>-1</sup><br>19.6 W h kg <sup>-1</sup> /22.5 kW kg <sup>-1</sup>  | [79]      |
| cNiCo <sub>2</sub> O <sub>4</sub> //VACNFs (Li <sup>+</sup> ) | 1-4.2 V        | 136.9 W h kg <sup>-1</sup> /0.2 kW kg <sup>-1</sup><br>26.44 W h kg <sup>-1</sup> /40 kW kg <sup>-1</sup>   | [80]      |
